# Supplementary material for: Human monoclonal antibodies against Ross River virus target epitopes within the E2 protein and protect against disease
Source: PubMed Central journal article supplement (PMC7252634; doi:10.1371/journal.ppat.1008517), 2020-05-04
Supplement: ppat.1008517.s001.pdf [file ppat.1008517.s001.pdf]

**Table S1. Antibody variable gene region sequence features for RRV antibodies.** mRNA was isolated from clonal hybridoma cells, and cDNA was synthesized for Sanger automated DNA sequence analysis. The specific gene, allele, CDR length, and V-D and D-J junctions were determined through use of the IMGT program.

| Name      | V-GENE and allele                                  | J-GENE and allele                                            | D-GENE and allele      | CDR-IMGT lengths | AA JUNCTION                       |
|-----------|----------------------------------------------------|--------------------------------------------------------------|------------------------|------------------|-----------------------------------|
| RRV 6-HC  | <i>IGHV3-23*04 F</i> , or<br><i>IGHV3-23D*02 F</i> | <i>IGHJ5*01 F</i> , or<br><i>IGHJ5*02 F</i><br>(see comment) | <i>IGHD6-13*01 F</i>   | 8.8.11           | CANLYISSWYLYW                     |
| RRV 6-LC  | <i>IGKV3-15*01 F</i>                               | <i>IGKJ1*01 F</i>                                            |                        | 6.3.11           | CQQYNDWPPGGTF                     |
| RRV 12-HC | <i>IGHV4-31*03 F</i>                               | <i>IGHJ3*02 F</i>                                            | <i>IGHD5-24*01 ORF</i> | 10.7.15          | CARVGGDGNNRDA<br>FDIW             |
| RRV 12-LC | <i>IGLV3-1*01 F</i>                                | <i>IGLJ3*02 F</i>                                            |                        | 6.3.9            | CQAWDSTTGVF                       |
| RRV 19-HC | <i>IGHV3-21*01 F</i>                               | <i>IGHJ6*02 F</i>                                            | <i>IGHD2-15*01 F</i>   | 8.8.18           | CARDDCSGSSCYYY<br>YGMDVW          |
| RRV 19-LC | <i>IGKV2-28*01 F</i> , or<br><i>IGKV2D-28*01 F</i> | <i>IGKJ3*01 F</i>                                            |                        | 10.3.11          | CMQALQTPRSFTF                     |
| RRV 34-HC | <i>IGHV3-7*01 F</i>                                | <i>IGHJ4*02 F</i>                                            | <i>IGHD6-19*01 F</i>   | 8.8.13           | CARDFDSSGWFP<br>A<br>YW           |
| RRV 34-LC | <i>IGLV8-61*01 F</i>                               | <i>IGLJ3*02 F</i>                                            |                        | 9.3.X            | CLLYMISVLS#VF                     |
| RRV 49-HC | <i>IGHV4-61*01 F</i>                               | <i>IGHJ4*02 F</i>                                            | <i>IGHD3-22*01 F</i>   | 10.7.14          | CARGTRGYPPQGY<br>P<br>DSW         |
| RRV 49-LC | <i>IGLV3-10*01 F</i>                               | <i>IGLJ3*02 F</i>                                            |                        | 6.3.10           | CYSTDSSGTPLF                      |
| RRV 86-HC | <i>IGHV2-70*01 F</i>                               | <i>IGHJ4*02 F</i>                                            | <i>IGHD6-13*01 F</i>   | 10.7.11          | CTGGSSWYVPDYW                     |
| RRV 86-LC | <i>IGLV1-44*01 F</i>                               | <i>IGLJ2*01 F</i> , or<br><i>IGLJ3*01 F</i>                  |                        | 8.3.12           | CAVWDNSLNGR<br>V<br>V<br>F        |
| RRV 92-HC | <i>IGHV3-15*01 F</i>                               | <i>IGHJ4*02 F</i>                                            | <i>IGHD3-10*01 F</i>   | 8.10.19          | CVNEAYYYGSG<br>S<br>Y<br>WEYYFDYW |
| RRV 92-LC | <i>IGLV3-19*01 F</i>                               | <i>IGLJ2*01 F</i> , or<br><i>IGLJ3*01 F</i>                  |                        | 6.3.10           | CNSRDTSGNH<br>L<br>F              |

|                   |                                                                                |                                             |                      |         |                               |
|-------------------|--------------------------------------------------------------------------------|---------------------------------------------|----------------------|---------|-------------------------------|
| <b>RRV 130-HC</b> | <i>IGHV1-24*01 F</i>                                                           | <i>IGHJ2*01 F</i>                           | <i>IGHD3-10*01 F</i> | 8.8.21  | CTTGSYYHGWSYS<br>GRNWWYFDLW   |
| <b>RRV 130-LC</b> | <i>IGLV3-19*01 F</i>                                                           | <i>IGLJ2*01 F</i> , or<br><i>IGLJ3*01 F</i> |                      | 6.3.6   | CNSRDSGF                      |
| <b>RRV 133-HC</b> | <i>IGHV3-30*03 F</i> , or<br><i>IGHV3-30*18 F</i> or<br><i>IGHV3-30-5*01 F</i> | <i>IGHJ6*02 F</i>                           | <i>IGHD3-3*02 F</i>  | 8.8.23  | CARDQGLEVAFSQ<br>WSHYDYGGMDVW |
| <b>RRV 133-LC</b> | <i>IGLV2-14*01 F</i>                                                           | <i>IGLJ2*01 F</i> , or<br><i>IGLJ3*01 F</i> |                      | 9.3.11  | CSSYTSISTSVLF                 |
| <b>RRV 135-HC</b> | <i>IGHV1-24*01 F</i>                                                           | <i>IGHJ4*02 F</i>                           | <i>IGHD3-10*01 F</i> | 8.8.19  | CATVAHYHGSDSY<br>NFYDFW       |
| <b>RRV 135-LC</b> | <i>IGLV3-19*01 F</i>                                                           | <i>IGLJ2*01 F</i> , or<br><i>IGLJ3*01 F</i> |                      | 6.3.12  | CTSRDSSSDLVIF                 |
| <b>RRV 136-HC</b> | <i>IGHV3-15*01 F</i>                                                           | <i>IGHJ5*02 F</i>                           | <i>IGHD2-8*01 F</i>  | 8.10.10 | CMTESDMTFDPW                  |
| <b>RRV 136-LC</b> | <i>IGKV2-28*01 F</i> , or<br><i>IGKV2D-28*01 F</i>                             | <i>IGKJ3*01 F</i>                           |                      | 11.3.9  | CMQALQTPYTF                   |
| <b>RRV 139-HC</b> | <i>IGHV3-23*04 F</i>                                                           | <i>IGHJ6*02 F</i>                           | <i>IGHD4-17*01 F</i> | 8.8.16  | CATATTVTYYYYYG<br>MDVW        |
| <b>RRV 139-LC</b> | <i>IGKV2-28*01 F</i> , or<br><i>IGKV2D-28*01 F</i>                             | <i>IGKJ3*01 F</i>                           |                      | 11.3.10 | CMQALQPPRFTF                  |
| <b>RRV-191 HC</b> | <i>IGHV4-38-2*01 F</i>                                                         | <i>IGHJ6*02 F</i>                           | <i>IGHD2-21*02 F</i> | 9.7.15  | CVRERVGVTSYFG<br>MDVW         |
| <b>RRV-191 LC</b> | <i>IGKV-39*01 F</i> or<br><i>IGKV1D-39*01 F</i>                                | <i>IGKJ4*01 F</i>                           |                      | 6.8.8   | CHQSYTGNTF                    |
| <b>RRV-196 HC</b> | <i>IGHV3-15*01 F</i>                                                           | <i>IGHJ1*01 F</i>                           | <i>IGHD3-3*01 F</i>  | 8.8.22  | CTTISYYDFWSGHY<br>MGREEYFQHW  |
| <b>RRV-196 LC</b> | <i>IGLV3-19*01 F</i>                                                           | <i>IGLJ2*01 F</i> or<br><i>IGLJ3*01 F</i>   |                      | 6.3.12  | CNSRDSSGDPHVVF                |
| <b>RRV-199 HC</b> | <i>IGHV3-33*01 F</i> , or<br><i>IGHV3-33*05</i> or<br><i>IGHV3-33*06 F</i>     | <i>IGHJ6*202 F</i>                          | <i>IGHD6-19*01</i>   |         |                               |
| <b>RRV-199 LC</b> | <i>IGLV2-8*01 F</i>                                                            |                                             |                      | 9.3.11  | CSSYADNNNFVVF                 |

|                   |                                                                  |                                      |                      |         |                                       |
|-------------------|------------------------------------------------------------------|--------------------------------------|----------------------|---------|---------------------------------------|
|                   |                                                                  | <i>IGLJ2*01 F, or<br/>IGLJ3*01 F</i> |                      |         |                                       |
| <b>RRV-200 HC</b> | <i>IGHV3-21*01 F, or<br/>IGHV3-21*02 F</i>                       | <i>IGHJ6*02 F</i>                    | <i>IGHD3-22*01 F</i> | 8.8.28  | CAREIVSYGDYGDS<br>SGTSKYFYYYGVD<br>VW |
| <b>RRV-200 LC</b> | <i>IGKV1-12*01 F, or<br/>IGKV1-12*02, or<br/>IGKV1D-12*02 F</i>  | <i>IGKJ3*01 F</i>                    |                      | 6.3.11  | CQQANSFPPGFTF                         |
| <b>RRV-201 HC</b> | <i>IGHV3-33*01 F, or<br/>IGHV3-33*05 F, or<br/>IGHV3-33*06 F</i> | <i>IGHJ6*02</i>                      | <i>IGHD6-19*01 F</i> | 8.8.18  | CARDQQQLVLRP<br>GWYGMVDVW             |
| <b>RRV-201 LC</b> | <i>IGLV2-8*01 F</i>                                              | <i>IGLJ2*01 F, or<br/>IGLJ3*01 F</i> |                      | 9.3.11  | CSSYADNNNFVVF                         |
| <b>RRV-205 HC</b> | <i>IGHV3-73*02 F</i>                                             | <i>IGHJ6*02</i>                      | <i>IGHD5-12*01 F</i> | 8.10.16 | CLGNSGYDPEYFYG<br>MDVW                |
| <b>RRV-205 LC</b> | <i>IGLV6-57*01 F, or<br/>IGLV6-57*02 F</i>                       | <i>IGLJ2*01 F, or<br/>IGLJ3*01 F</i> |                      | 8.3.9   | CQSYDRSNVVF                           |
| <b>RRV-207 HC</b> | <i>IGHV4-34*01 F</i>                                             | <i>IGHJ4*02 F</i>                    | <i>IGHD6-13*01 F</i> | 8.7.13  | CARYVLGSSWPFDY<br>W                   |
| <b>RRV-207 LC</b> | <i>IGKV1-39*01 F, or<br/>IGKV1D-39*01</i>                        | <i>IGKJ4*01 F</i>                    |                      | 6.3.9   | CQQSSSTPLTF                           |
| <b>RRV-210 HC</b> | <i>IGHV3-11*01F</i>                                              | <i>IGHJ5*02 F</i>                    | <i>IGHD1-26*01 F</i> | 8.8.16  | CARSVMGGTTMGE<br>WFDPW                |
| <b>RRV 210 LC</b> | <i>IGLV1-40*01 F</i>                                             | <i>IGLJ2*01 F, or<br/>IGLJ3*01 F</i> |                      | 9.3.12  | CQSYDSSLSGSVVF                        |
| <b>RRV-221 HC</b> | <i>IGHV1-18*01 F</i>                                             | <i>IGHJ6*02 F</i>                    | <i>IGHD3-10*01 F</i> | 8.8.22  | CAREEGITLVRGTSN<br>YYYYGMDVW          |
| <b>RRV-221 LC</b> | <i>IGKV2-28*01 F, or<br/>IGKV2D-28*01 F</i>                      | <i>IGKJ2*01 F</i>                    |                      | 11.3.9  | CMQALQTPHTF                           |
