# Supplementary material for: Human monoclonal antibodies against Ross River virus target epitopes within the E2 protein and protect against disease
Source: PubMed Central journal article supplement (PMC7252634; doi:10.1371/journal.ppat.1008517), 2020-05-04
Supplement: ppat.1008517.s002.pdf [file ppat.1008517.s002.pdf]

**Table S2. Summary of neutralization of different RRV strains.** The IC<sub>50</sub>, or concentration that gives a 50% reduction with accompanying 95% credible intervals, is listed along with R<sup>2</sup>, or percent of the variability explained by the regression fit, and E<sub>max</sub>, the estimated percentage maximum neutralization.

| RRV strain | MAb     | Neutralization IC <sub>50</sub> (ng/mL) | [95% credible interval] | R <sup>2</sup> | E <sub>max</sub> |
|------------|---------|-----------------------------------------|-------------------------|----------------|------------------|
| T48        | RRV-6   | 2,294                                   | [509 – 12,228]          | 0.59           | 66               |
|            | RRV-12  | 63                                      | [8.3 - > 2E5]           | 0.73           | 70               |
|            | RRV-19  | 16                                      | [13 - 23]               | 0.92           | 99               |
|            | RRV-34  | 286                                     | [16 - > 2E5]            | 0.48           | 61               |
|            | RRV-49  | 58                                      | [26 – 128]              | 0.90           | 99               |
|            | RRV-86  | 174                                     | [55 - 636]              | 0.72           | 65               |
|            | RRV-92  | 11                                      | [2.7 - 57]              | 0.95           | 91               |
|            | RRV-130 | 5.7                                     | [2.9 - 10]              | 0.78           | 101              |
|            | RRV-133 | 29                                      | [21 - 41]               | 0.94           | 101              |
|            | RRV-135 | 10                                      | [6.3 - 14]              | 0.88           | 93               |
|            | RRV-136 | 988                                     | [157 - > 2E5]           | 0.73           | 67               |
|            | RRV-139 | 47                                      | [14 - 135]              | 0.80           | 96               |
|            | RRV-191 | 334                                     | [142 - 905]             | 0.79           | 96               |
|            | RRV-196 | 75                                      | [23 - 205]              | 0.85           | 96               |
|            | RRV-199 | 6.7                                     | [2.8 - 18]              | 0.86           | 95               |
|            | RRV-200 | 27                                      | [18 - 42]               | 0.94           | 100              |
|            | RRV-201 | 49                                      | [21 - 112]              | 0.86           | 93               |
|            | RRV-205 | 334                                     | 70 – 2,288]             | 0.56           | 70               |
|            | RRV-207 | 1,487                                   | [901 – 2,429]           | 0.92           | 92               |
|            | RRV-210 | 13                                      | [7.8 - 22]              | 0.87           | 100              |
| RRV-221    | 33      | [6.8 - 217]                             | 0.87                    | 90             |                  |
| PW7        | RRV-19  | 12                                      | [8.2 - 16]              | 0.93           | 97               |
|            | RRV-92  | 18                                      | [8.6 - 43]              | 0.81           | 81               |
|            | RRV-130 | 4.1                                     | [1.3 - 8.4]             | 0.77           | 100              |

|         |         |     |            |      |    |
|---------|---------|-----|------------|------|----|
|         | RRV-135 | 12  | [6.9 - 19] | 0.85 | 94 |
| SN11    | RRV-19  | 10  | [7 - 14]   | 0.92 | 96 |
|         | RRV-92  | 17  | [11 - 34]  | 0.88 | 80 |
|         | RRV-130 | 9.0 | [5.9 - 13] | 0.9  | 99 |
|         | RRV-135 | 8.7 | [5.9 - 13] | 0.86 | 94 |
| PW14    | RRV-19  | 13  | [6.9 - 28] | 0.65 | 86 |
|         | RRV-92  | 70  | [29 - 202] | 0.86 | 74 |
|         | RRV-130 | 11  | [8.5 - 14] | 0.94 | 96 |
|         | RRV-135 | 14  | [10 - 23]  | 0.89 | 92 |
| 2897601 | RRV-19  | 12  | [9.9 - 15] | 0.95 | 95 |
|         | RRV-92  | 41  | [16 - 147] | 0.85 | 79 |
|         | RRV-130 | 13  | [7.4 - 24] | 0.84 | 98 |
|         | RRV-135 | 15  | [8 - 38]   | 0.72 | 82 |
| O'Regan | RRV-19  | 12  | [9.2 - 14] | 0.94 | 94 |
|         | RRV-92  | 105 | [41 - 313] | 0.79 | 81 |
|         | RRV-130 | 12  | [9.5 - 16] | 0.94 | 97 |
|         | RRV-135 | 17  | [12 - 25]  | 0.94 | 96 |
