# Supplementary material for: Human monoclonal antibodies against Ross River virus target epitopes within the E2 protein and protect against disease
Source: PubMed Central journal article supplement (PMC7252634; doi:10.1371/journal.ppat.1008517), 2020-05-04
Supplement: ppat.1008517.s003.pdf [file ppat.1008517.s003.pdf]

**Table S3. Primers used for qRT-PCR viral RNA quantification in mice studies.**

One-step qRT-PCR was performed using RRV-specific forward and reverse primers in addition to a probe with 6FAM 5' dye.

| <b>Primer Name</b> | <b>Sequence</b>                                |
|--------------------|------------------------------------------------|
| RRV_For            | GTGTTCTCCGGAGGTAAAGATAG                        |
| RRV_Rev            | TCGCGGCAATAGATGACTAC                           |
| RRV_probe          | 5'6-FAM/ACCTGTTTA/ZEN/CCGCAATGGACACCA/3'IABkFQ |
