# Supplementary material for: Human monoclonal antibodies against Ross River virus target epitopes within the E2 protein and protect against disease
Source: PubMed Central journal article supplement (PMC7252634; doi:10.1371/journal.ppat.1008517), 2020-05-04
Supplement: ppat.1008517.s004.pdf [file ppat.1008517.s004.pdf]

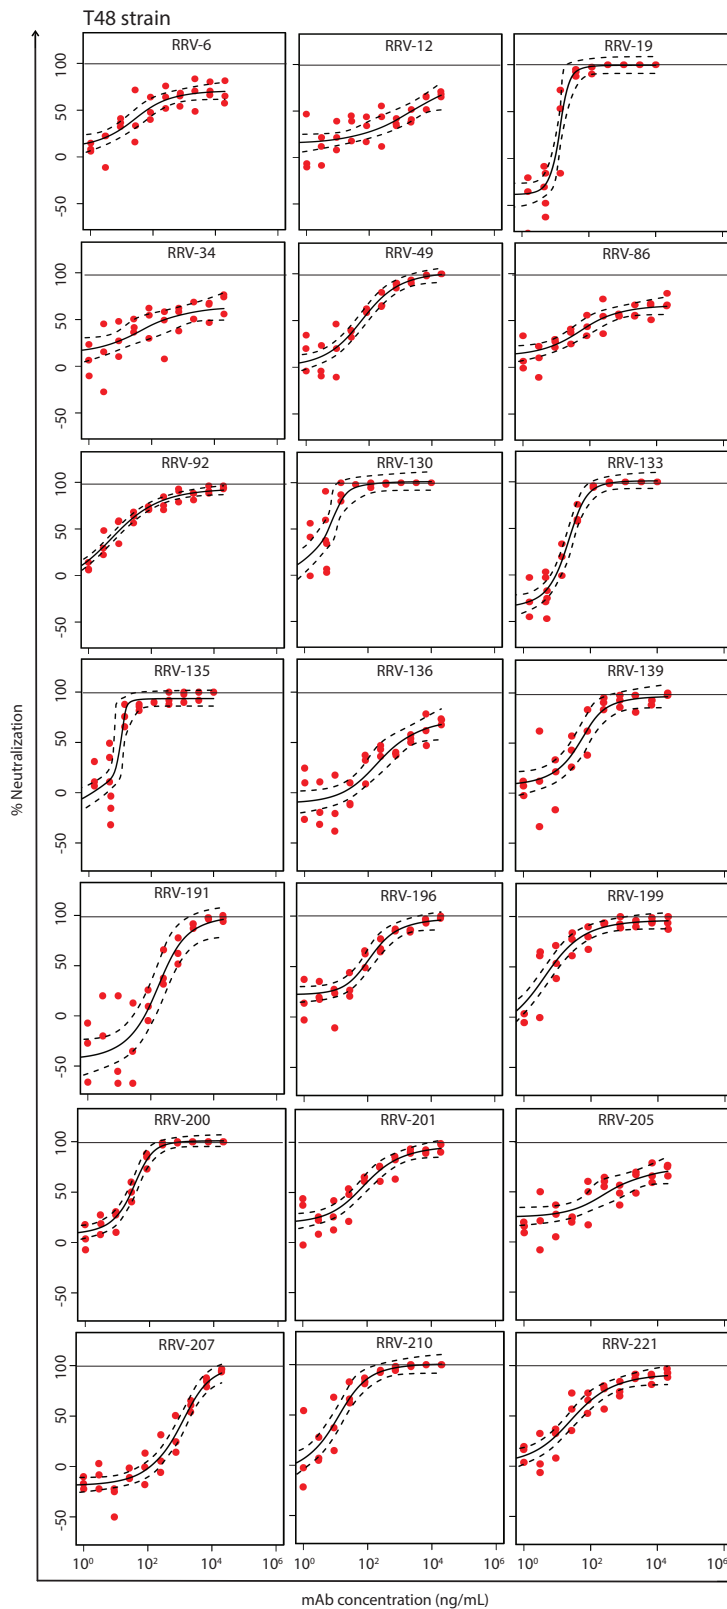

**Figure S1. Neutralization activity of RRV mAbs against RRV strain T48.** Red circles represent percent neutralization relative to control at different antibody concentrations. Logistic curves are indicated by solid lines, and 95% credible intervals are indicated by dashed lines. A line at 100% neutralization highlights mAbs that completely neutralize. Multiple experiments were performed in triplicate, and the best fit curve is shown.
