# Supplementary material for: Human monoclonal antibodies against Ross River virus target epitopes within the E2 protein and protect against disease
Source: PubMed Central journal article supplement (PMC7252634; doi:10.1371/journal.ppat.1008517), 2020-05-04
Supplement: ppat.1008517.s007.pdf [file ppat.1008517.s007.pdf]

## SUPPLEMENTAL METHODS

### Logistic curve analysis used to calculate IC<sub>50</sub> values for neutralization assays

The logistic growth curve we considered for concentration  $x$  includes five parameters  $\beta_1$ ,  $\beta_2$ ,  $\beta_3$ ,  $\beta_4$ , and  $\beta_5$ . The function follows the following form:

$$f(x) = \beta_1 + \frac{\beta_2 - \beta_1}{1 + g_x \exp\left(\frac{\beta_3 - x}{\beta_4}\right) + (1 - g_x) \exp\left(\frac{\beta_3 - x}{\beta_5}\right)}$$

where

$$g_x = \frac{1}{1 + \exp\left(-\overline{C}_g(\beta_3 - x)\right)}$$

is a logistic weighting function varying smoothly between 0 and 1, centered about the 50% reduction point. If  $\beta_4$  and  $\beta_5$  are the same sign, then the mean curvature of  $g$  was determined by the reciprocal of the mean

$$\overline{C}_g = \frac{2}{|\beta_4 + \beta_5|}$$

$\beta_1$  is the lower asymptote;  $\beta_2$  is the upper asymptote;  $\beta_3$  is inflection point of the function which corresponds to a 50% reduction point;  $\beta_4$  and  $\beta_5$  controls the relative steepness or shallowness of the logistic curve (note that this parameterization does not assume symmetry).
